# Supplementary material for: A CD8+ NK cell transcriptomic signature associated with clinical outcome in relapsing remitting multiple sclerosis
Source: PubMed Central journal article supplement (PMC7840761; doi:10.1038/s41467-020-20594-2), 2021-01-27
Supplement: 41467_2020_20594_MOESM2_ESM.pdf [file 41467_2020_20594_MOESM2_ESM.pdf]

Reviewers' comments:

Reviewer #1 (Remarks to the Author):

Note: It was not possible to find any methods uploaded for this study, so this review was performed without knowing what these were.

Study findings:

This study uses unsupervised network transcriptomic analysis of sorted CD8+ cells from the peripheral blood of patients with CIS with subsequent sampling and analysis of those patients who then experienced a relapse. They reveal a subset of NK cells (CD3-, CD56+) within this CD8 population, which correlate with a positive clinical outcome i.e patients were less likely to relapse, and hypothesise, using in vitro assays, that the mechanism of action is through their superior ability to suppress autologous CD4 T cells compared to their CD8- counterparts.

Comments:

Despite identifying a potentially important subset of NK cells in this study, it is unclear why CD8 was chosen as the primary target for sorting PBMCs – a couple of lines of explanation would be helpful to lead the reader into the study.

CD8 is also expressed on human monocytes and therefore these cells could form one of the modules. The associated text should consider their presence to some extent.

Figure 1C identifies a strong enrichment for NK cell-specific transcripts - such as? There is a lack of detail given about the phenotype of these cells. How was this conclusion made? A supplementary table of this data or a different type of figure to demonstrate this would be helpful due to the current lack of granularity in these findings.

In vitro assays show that CD8+ NK cells have a higher suppressive effect on proliferating CD4 T cells than CD8- NK cells – what stimulation was given here? (appreciate there are no methods shown) but this should be included in figure legend.

HLA-G-associated inhibition of CD8- NK cells to explain their inferior suppressive effects was hypothesised based on comparative inhibitory KIR profiles. This was tested in a separate assay, which did not include CD4 T cells. Could this be proven with more confidence using HLA-G blockade in the same CD8/CD4 assay to exclude other contributing factors?

Figure 3B – what is the x-axis measuring?

Overall, the findings in two separate patient cohorts suggest that measuring the proportion of CD8+ NK cells at disease onset may provide a supportive measure in which to stratify patients into appropriate risk/severity groups. NK cells are clearly performing a role in disease based on other studies, including those in relation to treatment response (eg. their expansion in response to DMF. Marastoni et al. Front Imm. 2019), but their exact function, which is likely to differ according to subset, remains less well defined. This study provides some insight into this, however the data that has been obtained could be better showcased and could provide a more appreciable level of resolution to be used to improve future phenotyping assays, which may become part of a future clinical assessment portfolio.

Reviewer #2 (Remarks to the Author):

McKinney et al present in this well written manuscript the role of CD8+ NK cells on MS clinical

course, detailing their immunoregulatory role on activated CD4+ T cells. Authors used a transcriptomic analysis of CD8+ lymphocytes correlating findings of eigengenes with prospective data obtained from a Phase II clinical trial (STATyCIS, atorvastatine vs. placebo) in a population of RRMS patients. Four gene modules were found to be associated with clinical data, and one of them were enriched for NK cell specific transcripts, which reflected an expanded population associated with reduced risk of relapse after a first demyelinating event.

Afterwards, and following a similar approach used by other authors (Bielekova B, et al. PNAS 2006; 103: 5941-5946; Nielsen N, et al. PLoS One 2012; 7: e31959; Gross CG, et al, PNAS 2016; 113: E2973-82; Laroni A, et al. J Autoimmun 2016; 72: 8-18), NK cells were studied in functional experiments as potential immunoregulators of activated T lymphocytes (CD4+ and CD8+), showing a prominent role of NK8+ cells to control autologous CD4+ T cells. This finding was related to a lower expression of inhibitory receptors on NK8+ cells, which were not counterbalanced by HLA-G expression on target cells.

CD8+ NK cells are known to have a higher cytolytic capability as compared to CD8- NK cells (Addison EG, et al. Immunology 2005; 116: 354-361). By the other hand, NK cell immunoregulatory killing of CD4+ T cells is a well-documented property of these lymphocytes (Waggoner SN, et al. Nature 2011; 481: 394-8). Thus, the results of the study are a straightforward reinforcement of previous studies applied to the field of NK cells in MS. The manuscript is original in its approach to the study of the involvement of NK cells in MS using an unbiased analysis of CD8+ lymphocytes, providing a potential tool to identify those patients with a higher risk of relapses, which could be a valuable biomarker in a disease characterized by a huge heterogeneity and unpredictable clinical course.

Some questions are raised after reviewing the manuscript:

#### MAJOR COMMENTS:

1.- The study methodology is based on unsupervised network transcriptomics evaluating peripheral CD8+ leucocytes. Whereas the approach is unbiased, the decision to study CD8+ is not. Authors should clearly justify why they have decided to analyze CD8+ T cells, instead of other lymphocytes also involved in MS (e.g. CD4+ T cells, B cells).

2.- Samples were obtained from the STATyCIS phase II clinical trial. The primary endpoint (PEP) of the study was a combination of clinical and radiological outcomes: 1) the development of a clinical relapse within 12 months of enrollment, and 2) the presence of  $\geq 3$  T2 lesions in serial MRIs. STATyCIS showed that atorvastatin significantly decreased new MRI T2 lesions, but failed to achieve any significant results on relapses, thus not meeting primary endpoint. Whereas in the manuscript (Figure 1A), it is detached time to PEP and time to clinical flare, no information is provided concerning radiological data (except for some variables in Supplementary Table 1). In this regard, it is not clearly stated in the manuscript (i.e. Fig 1D) if the PEP variable used was the combined clinical and MRI endpoint of the STATyCIS or only clinical criteria of time to clinical flare.

Authors should clarify whether radiological variables have an influence in the main results of the study (i.e., association with CD8+ NK+ cells). If this is not the case, PEP as primary endpoint (combined clinical and radiological) should be change for time for clinical flare.

3.- Some important clinical information is missing in the manuscript, both for the STATyCIS trial participants and for the replication cohort.

- Where all patients (n=81) of the STATyCIS analyzed? For the sake of clarity, the manuscript should also clarify that MS patients were untreated at the time of analysis (as specified in the methodology of the STATyCIS clinical trial).

- Were basal demographic and clinical characteristics of patients related with differences in NK8+ cells? In this regard, clinical information concerning the independent cohort of 94 RRMS cases (GSE32915) should also be evaluated. This independent cohort was obtained from a previous study (Reference 27, Gurevich M, et al, BMC Med Genomics 2009; 2:46). Authors have to prove that there were not any clinical or demographic confounders (e.g., interferon-beta or other immunomodulatory therapies) associated with low NK8+ (Figure 2E). This fact is relevant since 32 of the patients (34%) in this cohort initiated immunomodulatory treatment during the follow-up, which could promote a reduction of NK cells (Martínez-Rodríguez JE, et al, Clin Immunol 2010; 137: 41-50).

- In the manuscript it is specified a period of 210 days from CIS onset to baseline visit (Supplementary Figure 1A), whereas in the original STATyCYS study, CIS patients were included within 90 days of symptom onset (Waubant E, et al, Neurology 2012; 78: 1171-1178). In this regard, since NK cells are known to decrease in periods of clinical MS activity, it would be relevant to evaluate whether basal levels of NK8+ in patients were indirectly related to the time from last relapse, excluding a possible bias related with regression to the mean in those patients with a lower risk of relapse and higher NK8+ cells.

4.- "A supervised clustering using the 'black' transcripts identified patient subgroups with distinct outcomes..." (lines 72-74).

How were defined the groups NK8low and NK8high? (Fig 2D)

For a translational clinical approach, do they have any correlation with cytometric values in MS patients expressed as percentages of NK cells?

The high NK8+ population identified in the study, was just a reflection of a general reduction in NK cells in relation to clinical activity? or specifically of these population within NK cells?

5.- Differences regarding CD56 dim and CD56bright NK cells: CD56bright NK cells may also express CD8. This fact is clearly illustrated by authors in Suppl.Fig 3B. Thus, the sentence regarding a similar contribution of CD56hi and NK8+ populations to regulation of autologous CD4+ T cells (lines 147-148) is inaccurate.

6.- Expression of CD8 in non-T cell populations: CD8 is expressed in alpha/beta heterodimers in T cells, whereas in NK cells CD8 is formed by alpha/alpha homodimers, which are characterized by a lower mean fluorescence intensity in flow cytometry. Thus, when authors defined CD8 expression in NK8low or NK8high, it can be misunderstood for the pattern of CD8 expression considered "bright" in T cells and "dim" in NK cells. A sentence explaining differences in CD8 expression in T cells and NK cells would avoid misinterpretation.

7.- Using a cytometric profiling, a reduced frequency of CD8dim NK cells in untreated CIS and RRMS patients as compared to controls was previously described (De Jager PL, et al, Brain 2008; 131: 1701-1711). These population was further identified as CD8lowCD56+CD3-CD4- (NK cells). However, this reduction in NK cells was not correlated with further clinical data. McKinney et al provide in this study interesting data correlating this population (NK8+ cells) with relapse risk. However, it would be relevant to confirm that NK8+ are lower in CIS/MS as compared to a control group to evaluate if the low NK8+ population described in the study is a general feature of MS or it is only perceived in those patients with a higher risk of relapses.

8.- KIR2DL4 may have a dual function as inhibitory or activating receptor (reviewed in Campbell KS, Purdy AK. Immunology 2011; 132: 315-325). KIR2DL4 is an unusual KIR receptor which has a long cytoplasmic tail, typical of inhibitory receptors. However, engagement of this receptor may result in enhancement of cytokine secretion. For the sake of precision, lines 106-107 and hypothesis concerning a lower expression of inhibitory receptors on CD8+ NK cells should have to be drawn up accordingly.

#### 9.- Statistical considerations:

- Sample size in Supplementary figure 5 (n=4-7) is too low to draw conclusions. Increasing sample size could allow the detection of possible significant differences for some KIRs (e.g., KIR2DL2, KIR2DS2) and NKG2A expression.

- Flow cytometry quantification of CD4+ and CD8+ T cell proliferation and activation is evaluated in Figure 2 using 2-way ANOVA. This statistical test evaluates the effect of two independent categorical factors on a dependent continuous variable. From the information presented in the manuscript, it can be deduced that the continuous variable is the T cell proliferation/activation. However, it is not clear which were the categorical variables introduced in the evaluation (the NK:T cell ratio?).

In this regard, authors showed relevant and clear data regarding the inhibition of proliferation (CFSE) and activation (HLA-DR) of CD4+ T cells by NK8+. Comparable results were not found studying CD8+ T cells, except for a lower expression of HLA-DR when a 4:1 ratio of NK8+ cells were analyzed (Fig 2F, NK8+, 47 vs. NK8-, 84), although values expressed as a ratio relative to paired NK8 cell-enriched culture did not showed any differences. Based on this figure, it could be speculated whether higher ratios of NK8+:CD8+ T may render significant results as found for CD4+ T cells.

- Please specify in Figure 3 the sample size and the groups that were pair-wise compared using Mann-Whitney.

#### MINOR COMMENTS:

- Supplementary Figure 1B-F shows comparable results studying frozen and fresh samples. Resistance to cryopreservation is a well-known characteristic of T lymphocytes and NK cells. Although authors clearly demonstrated in the study the viability of the frozen samples for the analysis, consider abbreviation of the figure and data provided.

- Please provide titles for supplementary tables. In addition, provide definition of abbreviations used.

- Please correct the term "StayCIS" for "STAYCIS" in legend of supplementary Fig 1 and 2.

- "(A)" is omitted in legend of supplementary Fig 1.

- Arrangement of figures and text in Figure 2 should be revised for the sake of clarity.

- Please specify all x-axis labels in supplementary figure 5.

- The independent cohort of MS patients included was constituted by 94 RRMS and CIS patients (62 and 32, respectively), whereas in the manuscript it is stated that they were all RRMS (line 28) (Gurevich M, et al, BMC Medical Genomics 2009). In addition, in Figure 3 it was mentioned that this cohort was formed by was 92 cases instead of 94.

Reviewer #3 (Remarks to the Author):

In their manuscript 'A subset of regulatory CD8+ Natural Killer cells predict favourable clinical outcome in relapsing multiple sclerosis', the authors attempt to demonstrate that a specific subset of CD8 positive natural killer (NK) cells is associated with a favorable clinical outcome in multiple sclerosis (MS) after a first demyelinating event.

As far as it can be deduced from limited available information, the author's performed a microarray-based transcriptional analysis of frozen peripheral blood mononuclear cells after enriching them for CD8 positive cells. Thereby, they identified that a transcriptional module resembling natural killer cells is specifically associated with the subsequent clinical course of MS. Overall the study identifies one interesting novel concept: identifying a potential predictive parameter for the clinical course of MS. If substantiated, such a predictive parameter would be of major relevance to the field as the course of MS can very poorly predicted at present. However, the authors fail to provide their data in a format that allows the reader to understand or retrace any of their experimental and analytical procedures. The main text is written in a non-scientific way without providing any useful details and it additionally appears as if a supplementary method section was inadvertently omitted from the submission. Also,

In conclusion, the study might identify some interesting findings, but it is impossible to appreciate or even evaluate them. I do not understand the format of the text and the overall inadequate way of presentation. Overall, I recommend rejecting this manuscript.

Major Points

The first part of the results section is not a result section, but lines 34 to 50 basically again introduce the field, similar to the introductory paragraph. This is redundant. If this is supposed to be a result section, it is not written in an acceptable way.

Since no methods section is available, none of the experimental procedures can be evaluated. For example, the following (and many more) clinical and experimental aspects remain unknown: What exactly were primary and secondary endpoints? Were only atorvastatin treated or untreated patients used? How many patients were included in the discovery trial? What were the exact inclusion and exclusion criteria? How many patients and samples blood cells were analyzed at what time points? How exactly was transcriptomics was performed? It can be concluded from the text that this was probably microarray, but how and which? How exactly were CD8 positive cells sorted? What was the exact duration follow-up for each patient?

Similarly, no analytical procedures are described or explained in the manuscript. For example, the following information (and many more details) are missing: How exactly were modules identified and defined? Which genes define the so-called 'black' module? Which genes are the CD8 cell intrinsic eigengenes? Which transcripts exactly were associated with T-cell exhaustion and how were they chosen?

The original discovery cohort was based on a clinical trial. The authors should explain whether this was an investigator initiated trial or whether this was a sponsored research agreement and whether the sponsor had any role in performing or initiating the analyses described in the present manuscript.

It is unclear to me why the authors focused on purified CD8+ leukocytes in the first place. Was this based on some former knowledge? Why not CD4+ and CD19+ as well? Were other subsets of peripheral blood analyzed?

The authors likely MACS sorted CD8+ cells from peripheral blood mononuclear cells and followed patients up for an unknown duration of time (maybe 12 or 18 months). And within these CD8+

positive cells there was an enrichment of a so-called black module. Although it remains unclear what exactly this module comprises, it can be deduced from the text that this module was enriched in NK cell transcripts. However, this seems like a self-fulfilling prophecy. When you sort for cytotoxic cells based on a surface marker then you will – naturally – discover cytotoxicity transcripts such as NK cell transcripts. What is the unexpected here? Can the authors provide something like a negative control? For example, a module that is associated with CD8+ T cells but DOES NOT show association with MS prognosis? In other words: Is the detection of the so-called black module only caused by the sorting procedure? And if not how can this be excluded?

#### Minor points

In the introductory paragraph the author's state that treatment of RRMS relapses has advanced greatly. This is incorrect. The treatment of relapses has basically remained unchanged for decades. Only treatment options for disease modification have changed considerably.

Why did the authors name their transcriptional modules by color such as black or steel blue? If the black module is strongly enriched for NK cell specific transcripts, why not give them a conclusive name such as NK cell module?

It is impossible to understand from the text how many healthy individuals were used to perform confirmatory RNA sequencing?

In line 100, the authors state that they used a validated flow cytometry panel to quantify NK cell receptors. How was this validated and by what?

In line 118, the author state that cytotoxicity was measured by surface translocation of the granule protein CD107. However, is this really equivalent to cell death? Why were no apoptosis or necroptosis markers used to quantify cell death?

In line 139, the authors state that their findings could be used as a predictive tool to guide aggressive therapy in relapsing-remitting multiple sclerosis. This it is a bold statement. At best the authors might demonstrate that the proportion of CD8+ cells is associated with the proportion of relapse free patients. But whether this is qualified to instruct treatment decisions is unknown and will require substantial additional work.

In line 143, the authors used the term valleys. I do not understand the meaning of this term here.

The abbreviations in Suppl. Fig. 2D and E are not explained.

It is incomprehensible from the legend of Supplementary Figure 3 whether the cells depicted in panel B were MACS sorted or not. If panel shows cells after sorting, why is there a large proportion CD8-CD56+ in the left panel? It would also help to not depict CD3-CD56+ cells, but instead depict all CD3- cells without limiting the pre-gating to CD56+ cells. Then the reader can retrace the gating.

All supplementary flow cytometry figures should have numbers indicating the proportion of cells in each gate.

I do not understand the use of supplementary figure 1B. Quantifying the mean fluorescence intensity of markers in flow cytometry is a quantification of protein abundance and does not show anything about the mRNA expression level and whether it is affected by freezing and thawing.

1 **Responses to reviewers' comments:**

2  
3 **Reviewer #1 (Remarks to the Author):**

4  
5 Note: It was not possible to find any methods uploaded for this study, so this review was performed  
6 without knowing what these were.

7  
8 **We thank the Reviewer for their comments and apologise that the methods section was inadvertently**  
9 **omitted. This has now been rectified with the section provided in full.**

10  
11 **Study findings:**

12  
13 This study uses unsupervised network transcriptomic analysis of sorted CD8+ cells from the peripheral  
14 blood of patients with CIS with subsequent sampling and analysis of those patients who then  
15 experienced a relapse. They reveal a subset of NK cells (CD3-, CD56+) within this CD8 population,  
16 which correlate with a positive clinical outcome i.e patients were less likely to relapse, and hypothesise,  
17 using in vitro assays, that the mechanism of action is through their superior ability to suppress  
18 autologous CD4 T cells compared to their CD8- counterparts.

19  
20 **Comments:**

21  
22 Despite identifying a potentially important subset of NK cells in this study, it is unclear why CD8 was  
23 chosen as the primary target for sorting PBMCs – a couple of lines of explanation would be helpful to  
24 lead the reader into the study.

25 **We thank the Reviewer for highlighting this point, which has also been raised by both other Reviewers**  
26 **and was not made sufficiently clear. CD8+ cells were selected for detailed analysis as we have**  
27 **previously identified an association between transcriptional signatures of CD8+ T cell exhaustion and**  
28 **clinical outcome in multiple autoimmune diseases (*Nature* 523, 612-616 (2015). We chose to enrich**  
29 **CD8+ cells with the prior expectation that a similar association may be present in MS. This was not**  
30 **found to be the case (Supp Fig 2E-F), although there are interesting parallels between the two**  
31 **mechanisms of exhaustion and NK autoregulation (both being important in controlling immunopathology**  
32 **in the context of chronic viral infection). This rationale is now made clear in the revised manuscript (lines**  
33 **19-36,44) with Supplementary data provided to illustrate the lack of association between CD8**  
34 **exhaustion signatures and outcome in MS (Supp Fig 2E, F).**

35  
36 CD8 is also expressed on human monocytes and therefore these cells could form one of the modules.  
37 The associated text should consider their presence to some extent.

38 **After CD8+ T cells, NK cells express the next highest level of CD8 amongst haematopoietic cell lineages**  
39 **with monocytes only expressing negligible levels. The relative expression level of CD8 mRNA is now**  
40 **illustrated in Supp Fig 3B with additional data panels provided to confirm low levels of non-T cell non-NK**  
41 **populations in the post-enrichment fractions used for transcriptional profiling (SuppFig 3C). We have**  
42 **also altered the manuscript text to remove the assertion that no other haematopoietic lineages express**  
43 **CD8 (line 75).**

44  
45 Figure 1C identifies a strong enrichment for NK cell-specific transcripts - such as? There is a lack of  
46 detail given about the phenotype of these cells. How was this conclusion made? A supplementary table  
47 of this data or a different type of figure to demonstrate this would be helpful due to the current lack of  
48 granularity in these findings.

49 **Additional detail about the enrichment process is now provided in the Methods section with additional**  
50 **clarification in the form of two new data panels in Fig1C. In brief, we have used two independent**  
51 **sources of NK-specific transcripts, namely the Human Gene Atlas (HGA, Su et al. PNAS**  
52 **2004;101(16):6062-7) and the Immune Response In Silico dataset (IRIS, Abbas et al. Genes Imm 2005;**  
53 **6(4):319-31) which are now both referenced in the manuscript. HGA defines cell/tissue specific**  
54 **transcripts across 79 human and 61 mouse tissue/cell types while the IRIS dataset defines immune cell**  
55 **subset-specific expression across 22 distinct immune cell subsets. The modular signature identified was**  
56 **enriched for NK-specific transcripts from each dataset, and not from other cells or tissues included. This**  
57 **is now illustrated more clearly in Fig1C, E and described/referenced in the text (line 71).**

58 **We further confirmed the source of the outcome-associated signature by isolating NK8+ cells (as they**  
59 **were not themselves represented in the above repositories) and undertaking RNAseq to identify an**  
60 **NK8+ specific signature. We then confirmed bidirectional enrichment of this NK8+ signature in the MS**  
61 **cohort data (Fig1G).**

62 **A supplementary Table of transcripts comprising the 'black' NK8+ modular signature and the NK**  
63 **enriched transcripts are now also provided (Supplementary Table 2).**

64  
65  
66  
67  
68  
69  
70  
71  
72  
73  
74  
75  
76  
77  
78  
79  
80  
81  
82  
83  
84  
85  
86  
87  
88  
89  
90  
91  
92  
93  
94  
95  
96  
97  
98  
99  
100  
101  
102  
103  
104  
105  
106  
107  
108  
109  
110  
111  
112  
113  
114  
115  
116  
117  
118  
119  
120  
121  
122  
123  
124  
125  
126

In vitro assays show that CD8+ NK cells have a higher suppressive effect on proliferating CD4 T cells than CD8- NK cells – what stimulation was given here? (appreciate there are no methods shown) but this should be included in figure legend.

Our apologies, the methods section should have been provided and is now. The cells were stimulated using polyclonal activation with anti-CD3/CD28 beads in the presence of non-limiting supplementary IL2 (10ng/ml). This information is now also included in the Figure legend as suggested.

HLA-G-associated inhibition of CD8- NK cells to explain their inferior suppressive effects was hypothesised based on comparative inhibitory KIR profiles. This was tested in a separate assay, which did not include CD4 T cells. Could this be proven with more confidence using HLA-G blockade in the same CD8/CD4 assay to exclude other contributing factors?

We thank the reviewer for this suggestion which is something that we had also considered. We have used a standardised NK cytotoxicity assay to quantify the response of NK8+ and NK8- to HLAG-mediated suppression. This includes MHC-deficient K562 cells as targets for NK-mediated cytotoxicity. Undertaking a comparable assay adding sHLAG to coculture of NK and CD4+/CD8+ T cells (as was undertaken in Fig 2) is complicated by the expression of HLAG binding receptors on both the NK cells and CD4/CD8 T cells. Consequently, while the assay can be done, it is not feasible to interpret any suppressive effect as being due to HLAG acting on the NK subset, rather than on the T cell population directly.

Figure 3B – what is the x-axis measuring?

Our apologies that this Figure's labelling was not sufficiently clear. The x-axis has now been clearly labelled and shows surface expression of CD107 on the NK subpopulations, an accepted marker of induced NK cytotoxicity (J Immunol Methods 2004 Nov;294(1-2):15-22.)

Overall, the findings in two separate patient cohorts suggest that measuring the proportion of CD8+ NK cells at disease onset may provide a supportive measure in which to stratify patients into appropriate risk/severity groups. NK cells are clearly performing a role in disease based on other studies, including those in relation to treatment response (eg. their expansion in response to DMF. Marastoni et al. Front Imm. 2019), but their exact function, which is likely to differ according to subset, remains less well defined. This study provides some insight into this, however the data that has been obtained could be better showcased and could provide a more appreciable level of resolution to be used to improve future phenotyping assays, which may become part of a future clinical assessment portfolio.

We thank the Reviewer for their supportive comments and constructive suggestions and agree that our study has the potential to improve early patient stratification and treatment selection.

Reviewer #2 (Remarks to the Author):

McKinney et al present in this well written manuscript the role of CD8+ NK cells on MS clinical course, detailing their immunoregulatory role on activated CD4+ T cells. Authors used a transcriptomic analysis of CD8+ lymphocytes correlating findings of eigengenes with prospective data obtained from a Phase II clinical trial (STATyCIS, atorvastatine vs. placebo) in a population of RRMS patients. Four gene modules were found to be associated with clinical data, and one of them were enriched for NK cell specific transcripts, which reflected an expanded population associated with reduced risk of relapse after a first demyelinating event.

Afterwards, and following a similar approach used by other authors (Bielekova B, et al. PNAS 2006; 103: 5941-5946; Nielsen N, et al. PLoS One 2012; 7: e31959; Gross CG, et al, PNAS 2016; 113: E2973-82; Laroni A, et al. J Autoimmun 2016; 72: 8-18), NK cells were studied in functional experiments as potential immunoregulators of activated T lymphocytes (CD4+ and CD8+), showing a prominent role of NK8+ cells to control autologous CD4+ T cells. This finding was related to a lower expression of inhibitory receptors on NK8+ cells, which were not counterbalanced by HLA-G expression on target cells.

CD8+ NK cells are known to have a higher cytolytic capability as compared to CD8- NK cells (Addison EG, et al. Immunology 2005; 116: 354-361). By the other hand, NK cell immunoregulatory killing of CD4+ T cells is a well-documented property of these lymphocytes (Waggoner SN, et al. Nature 2011; 481: 394-8). Thus, the results of the study are a straightforward reinforcement of previous studies applied to the field of NK cells in MS. The manuscript is original in its approach to the study of the



127 involvement of NK cells in MS using an unbiased analysis of CD8+ lymphocytes, providing a potential  
128 tool to identify those patients with a higher risk of relapses, which could be a valuable biomarker in a  
129 disease characterized by a huge heterogeneity and unpredictable clinical course.

130  
131 We thank the Reviewer for their comments and agree that our observations extend observations of NK-  
132 mediated T cell autoregulation in the context of chronic viral immunity into the field of MS.

133  
134 Some questions are raised after reviewing the manuscript:

135  
136 MAJOR COMMENTS:

137  
138 1.- The study methodology is based on unsupervised network transcriptomics evaluating peripheral  
139 CD8+ leucocytes. Whereas the approach is unbiased, the decision to study CD8+ is not. Authors should  
140 clearly justify why they have decided to analyze CD8+ T cells, instead of other lymphocytes also  
141 involved in MS (e.g. CD4+ T cells, B cells).

142 We very much agree with the Reviewer that our approach is unbiased and that our selection of CD8+  
143 cells as a substrate for profiling warranted better explanation. As indicated in response to Reviewer1  
144 above, we have included clear explanation of this in the text and Supplementary Figure 2E, F.

145  
146 2.- Samples were obtained from the STATyCIS phase II clinical trial. The primary endpoint (PEP) of the  
147 study was a combination of clinical and radiological outcomes: 1) the development of a clinical relapse  
148 within 12 months of enrollment, and 2) the presence of  $\geq 3$  T2 lesions in serial MRIs. STATyCIS showed  
149 that atorvastatin significantly decreased new MRI T2 lesions, but failed to achieve any significant results  
150 on relapses, thus not meeting primary endpoint. Whereas in the manuscript (Figure 1A), it is detached  
151 time to PEP and time to clinical flare, no information is provided concerning radiological data (except for  
152 some variables in Supplementary Table 1). In this regard, it is not clearly stated in the manuscript (i.e.  
153 Fig 1D) if the PEP variable used was the combined clinical and MRI endpoint of the STATyCIS or only  
154 clinical criteria of time to clinical flare. Authors should clarify whether radiological variables have an  
155 influence in the main results of the study (i.e., association with CD8+ NK+ cells). If this is not the case,  
156 PEP as primary endpoint (combined clinical and radiological) should be change for time for clinical flare.

157  
158 We thank the Reviewer for highlighting the importance of the PEP definitions used. In Figure 1A we  
159 have presented the correlation of unsupervised transcriptional modules with both 'PEP' and 'time to  
160 clinical flare'. PEP in this context reflects the combined endpoint of clinical ( $\geq 1$  clinical exacerbation) or  
161 radiological flare ( $\geq 3$  new T2 lesions with or without Gd+ enhancement), while the clinical flare reflects  
162 clinical exacerbations only. The former is the principal primary endpoint for the clinical STATyCIS trial  
163 (Waubant et al Neurology 2012;78(15):1171-8). We have now clarified our use of the term 'PEP' in the  
164 Figure legends (Fig1) and in the Methods section.

165  
166 3.- Some important clinical information is missing in the manuscript, both for the STATyCIS trial  
167 participants and for the replication cohort.

168  
169 - Where all patients (n=81) of the STATyCIS analyzed? For the sake of clarity, the manuscript should  
170 also clarify that MS patients were untreated at the time of analysis (as specified in the methodology of  
171 the STATyCIS clinical trial).

172 We thank the Reviewer for highlighting this important point. We have now clarified that all patients were  
173 untreated at the time of analysis (Supp Fig 1, Methods, introduction line 38) and included the numbers  
174 of patients included in analysis. Samples were not available from all participants and some were  
175 excluded on the basis of processing QC as indicated in Supp Fig2. 56/81 patients had valid samples  
176 collected of which 79% passed through the QC process with 44 included in the final analysis. This has  
177 now been clarified in Supp Figs 1,2 and methods.

178  
179 - Were basal demographic and clinical characteristics of patients related with differences in NK8+ cells?  
180 In this regard, clinical information concerning the independent cohort of 94 RRMS cases (GSE32915)  
181 should also be evaluated. This independent cohort was obtained from a previous study (Reference 27,  
182 Gurevich M, et al, BMC Med Genomics 2009; 2:46). Authors have to prove that there were not any  
183 clinical or demographic confounders (e.g., interferon-beta or other immunomodulatory therapies)  
184 associated with low NK8+ (Figure 2E). This fact is relevant since 32 of the patients (34%) in this cohort  
185 initiated immunomodulatory treatment during the follow-up, which could promote a reduction of NK cells  
186 (Martínez-Rodríguez JE, et al, Clin Immunol 2010; 137: 41-50).

187 We thank the Reviewer for raising this point and agree that excluding potentially confounding covariates  
188 is important. We have provided extensive baseline demographic and clinical covariates in  
189 Supplementary Table 1, illustrating the association of each with all transcriptional modules in

190 Supplementary Figure 2. None of these associations were significant as we have now indicated in  
191 Supplementary Table 1. For the validation cohort we have also now provided demographic data linked  
192 to the NK signature defined subgroups (Supplementary Table 5).

193 The NK8<sup>+</sup> signature identified was identified at baseline visit prior to therapy with no difference in the  
194 therapies administered between subgroups identified. Consequently, any impact of immunomodulatory  
195 treatment on NK cell number, proportion or phenotype is not relevant (as the signature was consistently  
196 measured before such therapy was given).

197  
198 - In the manuscript it is specified a period of 210 days from CIS onset to baseline visit (Supplementary  
199 Figure 1A), whereas in the original STATyCYS study, CIS patients were included within 90 days of  
200 symptom onset (Waubant E, et al, Neurology 2012; 78: 1171-1178). In this regard, since NK cells are  
201 known to decrease in periods of clinical MS activity, it would be relevant to evaluate whether basal  
202 levels of NK8<sup>+</sup> in patients were indirectly related to the time from last relapse, excluding a possible bias  
203 related with regression to the mean in those patients with a lower risk of relapse and higher NK8<sup>+</sup> cells.  
204 We have now provided in (Supplementary Table 1 and in Supp Fig 2D) evidence showing a lack of  
205 association between the NK8<sup>+</sup> signature and clinical traits associated with the baseline demyelinating  
206 episode that resulted in study enrolment. This includes the time from CIS event to study enrolment.  
207 We have also corrected the description of the screening phase duration from 210 days to 90 days  
208 (methods and SuppFig1).

209  
210 4.- "A supervised clustering using the 'black' transcripts identified patient subgroups with distinct  
211 outcomes..." (lines 72-74).  
212 How were defined the groups NK8<sup>low</sup> and NK8<sup>high</sup>? (Fig 2D)  
213 (We presume the Reviewer is referring to Fig1D)  
214 The Reviewer correctly points out that supervised hierarchical clustering can identify patient subgroups  
215 but that it is also necessary to identify which group reflects NK8<sup>hi</sup> or NK8<sup>lo</sup>-specific transcripts. For this  
216 we isolated NK8<sup>+</sup> cells from healthy donors, generating our own transcriptional signature of NK8<sup>+</sup>/NK8<sup>-</sup>  
217 cell subsets. We next undertook reciprocal gene set enrichment analysis, confirming that NK8<sup>+</sup> specific  
218 transcripts were significantly enriched in the NK8<sup>hi</sup> group and vice versa (as indicated in Fig 1G).

219  
220  
221 For a translational clinical approach, do they have any correlation with cytometric values in MS patients  
222 expressed as percentages of NK cells?

223 We agree that the ability to use %NK cells as a surrogate of the NK8<sup>+</sup> signature could facilitate  
224 translation and detection of patients at higher risk of relapse. However, while the NK8 signature is  
225 associated with clinical outcome (Fig1A) and in turn with an NK8<sup>+</sup> population it does not directly follow  
226 that the % of NK8<sup>+</sup> cells will be strongly associated with outcome. This likely reflects further phenotypic  
227 differences in the NK8 population that are captured by the transcriptional signature but not reflected in  
228 quantification by a smaller number of surface phenotypic markers and is consistent with previous gene  
229 expression associations in other diseases (e.g. *Nature* 523, 612-616 (2015), *J Clin Invest.*  
230 2011;121(10):4170-4179, *Nat.Med* 2010 May;16(5):586-91, *Journal for Immunotherapy of Cancer* 5(18)  
231 (2017), *Bioinformatics*, Volume 35, Issue 14, July 2019, Pages i436–i445)).  
232 We now show that % NK cells and %NK8<sup>+</sup> cells are not significantly associated with the combined PEP  
233 and consequently are not likely to be useful in prediction of disease outcome directly (Supplementary  
234 Fig 4A,B).

235  
236 The high NK8<sup>+</sup> population identified in the study, was just a reflection of a general reduction in NK cells  
237 in relation to clinical activity? or specifically of these population within NK cells?

238 The association between the 'black' NK8<sup>+</sup> eigengene and NK8<sup>+</sup> cells is much stronger than that seen  
239 with the % combined NK cells, although both are statistically significant and are now provided in a new  
240 Supplementary Figure (Supp Fig 4C, D).

241  
242  
243 5.- Differences regarding CD56 dim and CD56bright NK cells: CD56bright NK cells may also express  
244 CD8. This fact is clearly illustrated by authors in Suppl.Fig 3B. Thus, the sentence regarding a similar  
245 contribution of CD56hi and NK8<sup>+</sup> populations to regulation of autologous CD4<sup>+</sup> T cells (lines 147-148) is  
246 inaccurate.

247 We thank the Reviewer for their comments and agree that a minority of CD56<sup>hi</sup> NK may also be CD8<sup>+</sup> as  
248 illustrated in (now) SuppFig3C and we have modified the statement to reflect this (lines 150-151).

249  
250 6.- Expression of CD8 in non-T cell populations: CD8 is expressed in alpha/beta heterodimers in T cells,  
251 whereas in NK cells CD8 is formed by alpha/alpha homodimers, which are characterized by a lower  
252 mean fluorescence intensity in flow cytometry. Thus, when authors defined CD8 expression in NK8<sup>low</sup>

253 or NK8high, it can be misunderstood for the pattern of CD8 expression considered “bright” in T cells and  
254 “dim” in NK cells. A sentence explaining differences in CD8 expression in T cells and NK cells would  
255 avoid misinterpretation.

256 We agree with the Reviewer that NK cells overall expression lower levels of CD8 than CD3+CD8+ T cells  
257 and that the NK8+ population is a CD8+ subset with lower expression levels than their CD8+ T cell  
258 counterparts, but higher than the CD8- NK subset. We have now clarified this in the text as requested  
259 (line 75) and provide additional data in Supplementary Fig 3A and B illustrating protein expression of  
260 major immune subset markers in the enriched fraction used for transcriptomics alongside mRNA  
261 expression levels of CD8 in a range of immune cell subsets.  
262

263 7.- Using a cytometric profiling, a reduced frequency of CD8dim NK cells in untreated CIS and RRMS  
264 patients as compared to controls was previously described (De Jager PL, et al, Brain 2008; 131: 1701-  
265 1711). These population was further identified as CD8lowCD56+CD3-CD4- (NK cells). However, this  
266 reduction in NK cells was not correlated with further clinical data. McKinney et al provide in this study  
267 interesting data correlating this population (NK8+ cells) with relapse risk. However, it would be relevant  
268 to confirm that NK8+ are lower in CIS/MS as compared to a control group to evaluate if the low NK8+  
269 population described in the study is a general feature of MS or it is only perceived in those patients with  
270 a higher risk of relapses.

271 We thank the Reviewer for their comments and agree that reduced NK levels have previously been  
272 associated with active MS. The purpose of our study was to associate and characterise, using an  
273 unsupervised analysis, transcriptional signatures associated with clinical outcome in the StayCIS study.  
274 Consequently, confirming previous reports of reduced NK frequency in active MS compared to healthy  
275 individuals fell outside the remit of our analysis. Furthermore, we were unable to include this analysis as  
276 the StayCIS trial did not recruit healthy individuals but only patients following an episode of  
277 demyelination.  
278

279 8.- KIR2DL4 may have a dual function as inhibitory or activating receptor (reviewed in Campbell KS,  
280 Purdy AK. Immunology 2011; 132: 315-325). KIR2DL4 is an unusual KIR receptor which has a long  
281 cytoplasmic tail, typical of inhibitory receptors. However, engagement of this receptor may result in  
282 enhancement of cytokine secretion. For the sake of precision, lines 106-107 and hypothesis concerning  
283 a lower expression of inhibitory receptors on CD8+ NK cells should have to be draw up accordingly.

284 We thank the Reviewer for highlighting the complexity of the KIR2DL4 receptor and we have now  
285 amended the text to reflect this (lines 108-109).  
286

287 9.- Statistical considerations:

288  
289 - Sample size in Supplementary figure 5 (n=4-7) is too low to draw conclusions. Increasing sample size  
290 could allow the detection of possible significant differences for some KIRs (e.g., KIR2DL2, KIR2DS2)  
291 and NKG2A expression.

292 We agree with the Reviewer that with a larger sample size, smaller effect sizes may become statistically  
293 significant while the observed differences would become more so. The purpose of the analysis was to  
294 identify the most differentially expressed KIR receptors for further study and consequently expanding the  
295 size of these groups would not impact on our subsequent findings.  
296

297 - Flow cytometry quantification of CD4+ and CD8+ T cell proliferation and activation is evaluated in  
298 Figure 2 using 2-way ANOVA. This statistical test evaluates the effect of two independent categorical  
299 factors on a dependent continuous variable. From the information presented in the manuscript, it can be  
300 deduced that the continuous variable is the T cell proliferation/activation. However, it is not clear which  
301 were the categorical variables introduced in the evaluation (the NK:T cell ratio?).

302 We thank the Reviewer for pointing out that we had not made this clear. The categorical variable in  
303 question is indeed the NK:T cell ratio and this has been clarified in the legend for Fig2.  
304

305 In this regard, authors showed relevant and clear data regarding the inhibition of proliferation (CFSE)  
306 and activation (HLA-DR) of CD4+ T cells by NK8+. Comparable results were not found studying CD8+ T  
307 cells, except for a lower expression of HLA-DR when a 4:1 ratio of NK8+ cells were analyzed (Fig 2F,  
308 NK8+, 47 vs. NK8-, 84), although values expressed as a ratio relative to paired NK8 cell-enriched  
309 culture did not showed any differences. Based on this figure, it could be speculated whether higher  
310 ratios of NK8+:CD8+ T may render significant results as found for CD4+ T cells.

311 We agree with the Reviewer that higher ratios of NK:T cells (or indeed lower levels of proliferative  
312 stimulus for the CD8 T cells) may have unmasked an inhibitory effect of NK on CD8+ T cells also. We  
313 intentionally selected comparatively low NK:T cell ratios for this experiment (compared to other  
314 published models using ratios >50:1) to reflect likely physiologically relevant cellular interactions. We

315 have modified the text to speculate that higher ratios may result in CD8 T cell suppression as the  
316 Reviewer suggests (lines 97-99).  
317  
318 - Please specify in Figure 3 the sample size and the groups that were pair-wise compared using Mann-  
319 Whitney.

320 This has now been included in the legend for Fig3.

321

322 MINOR COMMENTS:

323

324 - Supplementary Figure 1B-F shows comparable results studying frozen and fresh samples. Resistance  
325 to cryopreservation is a well-known characteristic of T lymphocytes and NK cells. Although authors  
326 clearly demonstrated in the study the viability of the frozen samples for the analysis, consider  
327 abbreviation of the figure and data provided.

328 We thank the Reviewer for their supportive comments. We are aware that protocols for cryopreservation  
329 and viability rates can vary between groups and we elected to present our data in Supplementary  
330 material to clarify that our results were not influenced by this process.

331

332 - Please provide titles for supplementary tables. In addition, provide definition of abbreviations used.  
333 These have now been included.

334

335 - Please correct the term “StayCIS” for “STAyCIS” in legend of supplementary Fig 1 and 2.  
336 These have now been replaced as indicated.

337

338 - “(A)” is omitted in legend of supplementary Fig 1.  
339 This has now been included.

340

341 - Arrangement of figures and text in Figure 2 should be revised for the sake of clarity.  
342 We thank the Reviewer for this suggestion and we have modified the Figure layout to improve clarity.

343

344 - Please specify all x-axis labels in supplementary figure 5.  
345 This has now been amended.

346

347 - The independent cohort of MS patients included was constituted by 94 RRMS and CIS patients (62  
348 and 32, respectively), whereas in the manuscript it is stated that they were all RRMS (line 28) (Gurevich  
349 M, et al, BMC Medical Genomics 2009). In addition, in Figure 3 it was mentioned that this cohort was  
350 formed by was 92 cases instead of 94.

351 We thank the Reviewer for pointing out this error which has now been corrected with an additional  
352 Supplementary Table (Supp Table 5) showing the clinical characteristics of each patient in the validation  
353 cohort.

354

355

358

359

360

361 Reviewer #3 (Remarks to the Author):

362

363 In their manuscript ‘A subset of regulatory CD8+ Natural Killer cells predict favourable clinical outcome  
364 in relapsing multiple sclerosis’, the authors attempt to demonstrate that a specific subset of CD8 positive  
365 natural killer (NK) cells is associated with a favorable clinical outcome in multiple sclerosis (MS) after a  
366 first demyelinating event.

367

368 As far as it can be deduced from limited available information, the author's performed a microarray-  
369 based transcriptional analysis of frozen peripheral blood mononuclear cells after enriching them for CD8  
370 positive cells. Thereby, they identified that a transcriptional module resembling natural killer cells is  
371 specifically associated with the subsequent clinical course of MS. Overall the study identifies one  
372 interesting novel concept: identifying a potential predictive parameter for the clinical course of MS. If  
373 substantiated, such a predictive parameter would be of major relevance to the field as the course of MS  
374 can very poorly predicted at present. However, the authors fail to provide their data in a format that  
375 allows the reader to understand or retrace any of their experimental and analytical procedures. The  
376 main text is written in a non-scientific way without providing any useful details and it additionally appears  
377 as if a supplementary method section was inadvertently

378 omitted from the submission. Also,

379

380 In conclusion, the study might identify some interesting findings, but it is impossible to appreciate or  
381 even evaluate them. I do not understand the format of the text and the overall inadequate way of  
382 presentation. Overall, I recommend rejecting this manuscript.

383

384 **We apologise for frustrating the Reviewer with our data presentation and realise that the inadvertent  
385 omission of a methods section has greatly contributed to this. This has now been provided and the  
386 queries and comments below addressed in turn.**

387

388 Major Points

389 The first part of the results section is not a result section, but lines 34 to 50 basically again introduce the  
390 field, similar to the introductory paragraph. This is redundant. If this is supposed to be a result section, it  
391 is not written in an acceptable way.

392 **We thank the Reviewer for their suggestions and have now moved text describing the field and  
393 background immunology to the introductory section.**

394

395 Since no methods section is available, none of the experimental procedures can be evaluated. For  
396 example, the following (and many more) clinical and experimental aspects remain unknown: What  
397 exactly were primary and secondary endpoints? Were only atorvastatin treated or untreated patients  
398 used? How many patients were included in the discovery trial? What were the exact inclusion and  
399 exclusion criteria? How many patients and samples blood cells were analyzed at what time points? How  
400 exactly was transcriptomics was performed? It can be concluded from the text that this was probably  
401 microarray, but how and which? How exactly were CD8 positive cells sorted? What was the exact  
402 duration follow-up for each patient?

403

404 **Clearly the inclusion of our methods section is critical for the Reviewer and reader to appreciate our  
405 experimental approach and this is now provided in detail. The clinical trial (STAyCIS) on which the  
406 current study is based has also been published with full description of trial methods, inclusion/exclusion  
407 criteria and results. These are available in the referenced trial publication (Waubant et al Neurology  
408 2012;78(15):1171-8) and also summarised in the methods section for convenience.**

409

410 Similarly, no analytical procedures are described or explained in the manuscript. For example, the  
411 following information (and many more details) are missing: How exactly were modules identified and  
412 defined? Which genes define the so-called 'black' module? Which genes are the CD8 cell intrinsic  
413 eigengenes? Which transcripts exactly were associated with T-cell exhaustion and how were they  
414 chosen?

414

415 **As above, these details are now provided in the Methods section. Genes comprising the 'black' module  
416 associated with clinical outcome are also now listed in a Supplementary Table (Supp Table 2).  
417 Transcripts associated with CD8+ T cell exhaustion are also defined in the methods section.**

417

418 The original discovery cohort was based on a clinical trial. The authors should explain whether this was  
419 an investigator-initiated trial or whether this was a sponsored research agreement and whether the  
420 sponsor had any role in performing or initiating the analyses described in the present manuscript.

421

422 **We thank the Reviewer for highlighting this important issue. The STAyCIS trial was an investigator led  
423 clinical trial run by the Immune Tolerance Network with a clinical research consortium sponsored by the  
424 National Institute of Allergy and Infectious Diseases (NIAID). This information is now described in the  
425 methods section and made clear in the manuscript Acknowledgements.**

425

426 It is unclear to me why the authors focused on purified CD8+ leukocytes in the first place. Was this  
427 based on some former knowledge? Why not CD4+ and CD19+ as well? Were other subsets of  
428 peripheral blood analyzed?

429

430 **We thank the Reviewer for highlighting this point which has also been queried by both other Reviewers  
431 and addressed as above.**

431

432 The authors likely MACS sorted CD8+ cells from peripheral blood mononuclear cells and followed  
433 patients up for an unknown duration of time (maybe 12 or 18 months). And within these CD8+ positive  
434 cells there was an enrichment of a so-called black module. Although it remains unclear what exactly this  
435 module comprises, it can be deduced from the text that this module was enriched in NK cell transcripts.  
436 However, this seems like a self-fulfilling prophecy. When you sort for cytotoxic cells based on a surface  
437 marker then you will – naturally - discover cytotoxicity transcripts such as NK cell transcripts. What is the  
438 unexpected here? Can the authors provide something like a negative control? For example, a module  
439 that is associated with CD8+ T cells but DOES NOT show association with MS prognosis? In other

440 words: Is the detection of the so-called black module only caused by the sorting procedure? And if not  
441 how can this be excluded?

442 The Reviewer is correct that the experimental process involved MACS enrichment of CD8<sup>+</sup> cells from  
443 clinical samples taken during the STAYCIS study with clinical sampling, follow-up and collection details  
444 now described fully in the methods section, illustrated in Supp Fig1 and with trial protocol and design  
445 published previously (Waubant et al Neurology 2012;78(15):1171-8).

446 The enrichment of NK-cell specific transcripts within a population of CD8<sup>+</sup> cells is not a self-fulfilling  
447 prophecy however and multiple independent lines of evidence are provided in Fig1 to show that this is  
448 the case (with new data now also provided to illustrate this more clearly). Enrichment of NK-specific  
449 transcripts was indeed an unexpected finding as NK cells were not themselves targeted by the  
450 enrichment process (CD8<sup>+</sup> T cell intrinsic transcripts would be expected and are indeed identified in  
451 other modules). The nature of the NK-specific transcripts has now been clarified as detailed above in  
452 response to Reviewer 1 (lines 49-63, response to Reviewers).

453 In order to confirm specific enrichment of NK transcripts we compared the outcome associated ('black')  
454 module with two independent databases of cell and tissue specific transcripts (the Human Gene Atlas  
455 and the Immune Response In Silico dataset (IRIS)) and provide both summary statistics for these  
456 enrichments (Fig 1C, E) alongside new data more clearly illustrating the NK specificity of the relevant  
457 genes (Fig1C). As is now made clear (Fig1C, methods), these comparisons include multiple non-NK  
458 populations as controls (ie that are not enriched in the outcome associated module). All other modules  
459 identified in the unsupervised network analysis of the CD8<sup>+</sup> transcriptome (Fig1A) are CD8<sup>+</sup> Tcell  
460 modules that are not associated with MS clinical outcome (illustrating the specificity of the NK  
461 association). We further confirm the source of the 'black' module transcripts in Fig1G by sorting CD8<sup>+</sup>  
462 NK cells, generating an NK8<sup>+</sup> cell specific signature and showing that this is also enriched in the MS  
463 patients with poor outcome associated with the 'black' transcriptional module.

464

465 Minor points

466 In the introductory paragraph the author's state that treatment of RRMS relapses has advanced greatly.  
467 This is incorrect. The treatment of relapses has basically remained unchanged for decades. Only  
468 treatment options for disease modification have changed considerably.

469 We thank the author for this suggestion and have modified the introductory text accordingly (lines 14,15)

470

471 Why did the authors name their transcriptional modules by color such as black or steel blue? If the black  
472 module is strongly enriched for NK cell specific transcripts, why not give them a conclusive name such  
473 as NK cell module?

474 We have used unsupervised analysis of the whole CD8<sup>+</sup> cell transcriptome to identify groups of co-  
475 correlated genes that are associated with clinical traits in MS. This approach, followed by subsequent  
476 interrogation of genes comprising outcome-associated modules, allows for discovery of previously  
477 unsuspected associations. The use of colour-coded labels for such modules is an established approach  
478 (widely applied in the context of weighted network analysis, for examples see: Nature Communications  
479 volume 5, Article number: 3231 (2014), Nature. 2015 Jul 30;523(7562):612-6, BMC Bioinformatics  
480 2008;9:559.

481

482 The use of such colour coding appropriately highlights the unsupervised nature of the modules' initial  
483 discovery. We did not want to label the 'black' module as an 'NK module' before we had definitively  
484 demonstrated it to be one (as we do in Fig1).

485

486 It is impossible to understand from the text how many healthy individuals were used to perform  
487 confirmatory RNA sequencing?

488 We thank the Reviewer for highlighting this point which is described in the (previously omitted) methods  
489 section. We have also, for clarity, included the numbers (10 samples from 5 biological replicates) in the  
490 Figure legend for Fig1 where the data is presented.

491

492 In line 100, the authors state that they used a validated flow cytometry panel to quantify NK cell  
493 receptors. How was this validated and by what?

494 The flow cytometry panel used has been previously validated by testing against KIR deficient cell lines  
495 stably transfected with individual KIR genes. The validation is referenced in the manuscript (Ref#22)  
496 with additional provision of the staining panels, including antibody clone IDs, in Supplementary Table 3.

497

498 In line 118, the author state that cytotoxicity was measured by surface translocation of the granule  
499 protein CD107. However, is this really equivalent to cell death? Why were no apoptosis or necroptosis  
500 markers used to quantify cell death?

501 The surface translocation of CD107 is an established method for quantitating the functional activation of  
502 NK cells with surface expression levels shown to reflect both cytokine secretion and NK-mediated target

503 cell lysis (J Immunol Methods 2004 Nov;294(1-2):15-22.). Surface translocation is quantified on a  
504 population of live NK cells with dead and dying cells backgated. The assay is now described in the  
505 (previously omitted) methods section with reference of the background assay details.  
506

507 In line 139, the authors state that their findings could be used as a predictive tool to guide aggressive  
508 therapy in relapsing-remitting multiple sclerosis. This it is a bold statement. At best the authors might  
509 demonstrate that the proportion of CD8+ cells is associated with the proportion of relapse free patients.  
510 But whether this is qualified to instruct treatment decisions is unknown and will require substantial  
511 additional work.  
512 We agree with the Reviewer that further work will be required before the observations described can be  
513 used to instruct treatment decisions, although they do create the potential for this to happen. We have  
514 introduced appropriate caveats to make this clear in the manuscript (lines 155-6) and have now clarified  
515 with new data (in Supplementary Fig 4) that simply using the %NK8+ cells as quantified by flow  
516 cytometry is not a sufficiently robust means of achieving accurate patient stratification.  
517

518 In line 143, the authors used the term valleys. I do not understand the meaning of this term here.  
519 We apologise for the confusing terminology and have modified this to 'periods' (line 146).  
520

521 The abbreviations in Suppl. Fig. 2D and E are not explained.  
522 This has now been amended in the Figure legend.  
523

524 It is incomprehensible from the legend of Supplementary Figure 3 whether the cells depicted in panel B  
525 were MACS sorted or not. If panel shows cells after sorting, why is there a large proportion CD8-CD56+  
526 in the left panel? It would also help to not depict CD3-CD56+ cells, but instead depict all CD3- cells  
527 without limiting the pre-gating to CD56+ cells. Then the reader can retrace the gating.  
528 We have now clarified in the Figure legend (and in the methods section) how the MACS enrichment  
529 process was undertaken and have included additional scatterplots (Supp Fig 2A) to illustrate more  
530 clearly the phenotype of the CD3- 'contaminant' population as being CD56+CD8<sup>int</sup> NK cells. The new  
531 scatterplots shown are not limited to CD56+ cells but show biaxial gating of the enriched fraction of cells  
532 by characteristic surface markers the major immune cell subsets, thereby giving a clear overview of the  
533 populations taken forward for transcriptomics.  
534

535 All supplementary flow cytometry figures should have numbers indicating the proportion of cells in each  
536 gate.  
537 These have now been included.  
538

539 I do not understand the use of supplementary figure 1B. Quantifying the mean fluorescence intensity of  
540 markers in flow cytometry is a quantification of protein abundance and does not show anything about  
541 the mRNA expression level and whether it is affected by freezing and thawing.  
542 We thank the Reviewer for their comments on this point. During the freeze/thaw cycle it is feasible for  
543 there to be differential cell survival with some cell types or subsets being selectively depleted, for  
544 example through differential sensitivity to the freeze/thaw process. Such non-random losses would not  
545 register in a QC assessment of the retained populations, but nor would the retained material be directly  
546 representative of the original fresh sample. Consequently, we felt it was important to demonstrate that  
547 there was strong correlation between the phenotypic composition of fresh and frozen samples, which is  
548 illustrated in Supp Fig1B.  
549

## REVIEWER COMMENTS

### Reviewer #1 (Remarks to the Author):

The authors have largely addressed the points raised during the initial review of their study. Having now reviewed this again with the inclusion of the methods there are a few queries that remain.

It is very difficult to follow the study design regarding the timeline of events. In the results section, there is a primary and secondary endpoint. In the methods section there is a primary combined end point. In figure 1a, there is a primary end point, time to clinical flare, event leading to primary end point and phase of event. It would be helpful if the nomenclature was the same for all 3 sections, with a definition of what these are, making it clear how the NK8+ population relates to them.

#### Minor points:

1. The opening sentence to the results reads rather awkwardly and begins with what is not required before stating what was done. It makes the start of the results difficult to follow from the outset.
2. In the methods section, it reads, 'Cells were sorted into RNAlysis medium (XX)'.
3. Supplementary figure 3B – the text is unreadable.

This study supports the notion that better patient stratification at disease onset will enable more aggressive treatment options to be given to patients who are considered at higher risk of relapse and thus reduce disease severity in the longer term. These results contribute to how we may hope to achieve this, relying on a relatively straight forward additional analysis to routine blood screening tests that can be measured at disease onset.

### Reviewer #2 (Remarks to the Author):

After revision of the manuscript, the authors have properly answered the questions raised. The methodology is sound and clearly stated in the paper. Results are interesting, although sometimes not easy to follow, but with a potential translational approach in the MS field. My only concern is regarding a minor point about potential associations of NK8+ populations with modifications of the global NK cell compartment vs. specific NK8+ cells in relation to clinical activity, since data provided by the authors in the Responses to Reviewers do not seem to correspond to the mentioned figure (Supplementary Figure 4 C and D, the latter not included within the manuscript). I have nothing more to add.

### Reviewer #3 (Remarks to the Author):

In their revised manuscript 'A subset of regulatory CD8+ Natural Killer cells predict favourable clinical outcome in relapsing multiple sclerosis', the authors demonstrate that a transcriptional pattern expressed by CD8 positive natural killer (NK) cells among peripheral blood mononuclear cells is associated with a favorable clinical outcome in multiple sclerosis (MS) after a first demyelinating event.

In this revised version of the manuscript, the previously omitted supplementary methods section is now included and now adequately evaluating the manuscript is possible.

The authors first performed a microarray-based transcriptional analysis of CD8+ cells enriched from frozen peripheral blood mononuclear cells derived from a clinical trial of patients with a first



demyelinating event. In this dataset, they identified that a transcriptional module resembling natural killer cells that is specifically expressed in patients with a favorable clinical course of MS. They find that features of this module confer NK cells with enhanced suppressive capacity over autologous CD4 T cells through the invariant HLA-G molecule and confirm the predictive potential in a confirmatory patient cohort. Overall, the most interesting and relevant concept introduced by the study is the identification of a predictive biomarker for the subsequent clinical course of MS. Such a predictive parameter would be of major relevance to the field, since the course of MS cannot be well predicted at present.

In conclusion, the study has improved substantially from its previous version, identifies an interesting core finding, and would have relevance to the field. However, several aspects need improvement that could not be anticipated previously due to the lack of sufficient methodical information.

### Major Points

The main finding is the potential predictive potential of the NK8 module. How does that perform when compared against known clinical and MRI predictors like for example lesion load, recovery from first relapse, multifocal and spinal manifestation vs. optic neuritis only? Can the authors statistically quantify the predictive potential of the NK8 module for this comparison?

If the current manuscript is correct, then I could start composing a qPCR panel to quantify the top NK8 surrogates in PBMCs collected from my MS patients now. And thereby predict the likely clinical course of these patients. But how would I compose that panel? I cannot find a Suppl. Table that lists these optimal surrogates. Why not show at least some of them in Fig. 3D? Can the optimal surrogates be further prioritized? It seems from Suppl. Fig. 8C that there is some gradient in the importance of these optimal surrogates. Which transcripts fare best? How few surrogates would suffice to predict?

I cannot find an abstract in the manuscript file.

I consider Fig. 1B as the key plot of the manuscript. How would the plot look if it were separated into two plots by atorvastatin treatment vs. placebo? Related to this: is it correct that all CD8+ samples were collected before treatment? Is it then also correct that the atorvastatin treatment cannot have affected the expression of the module? This should be mentioned explicitly

I do not understand why the confirmation cohort in Fig. 3E is depicted as a Kaplan-Meier curve, but the main cohort as volcano plot in Fig. 1B. I think both plots for both cohorts would be interesting.

Some basic clinical details of the cANCA associated vasculitis patients used as negative controls should be provided; eg average age, disease duration, sex, CNS involvement yes/no, treatments, etc.

### Minor points

In lines 14-15 the author's state that treatment options of RRMS relapses have expanded. The authors have changed the sentence, but I must insist on this: Relapses themselves have been treated with steroid and plasmapheresis / immune-adsorption for decades. Nothing has changed about this. Only the treatment of relapsing-remitting MS (i.e. preventing relapses, not treating relapses) has expanded dramatically. There is a difference.

The paper by Gross et al. 2016 PNAS should be cited when discussing the function of NK cells in repressing CD4 T cells on pages 1 and 4.

I cannot find a definition of the abbreviations WGCNA (line 58), MSE, and AAV.

Fig 1B: label of the x-axis should probably be: correlation with 'time to' PEP. Otherwise what is the unit of the PEP here?

Legend of Fig. 1F refers to a radar plot on the left, but the plot is missing from the figure.

Fig. 1D: the heatmap probably depicts genes vs. patients, but it should be defined that columns refer to patients.

There is still an 'XX' as a placeholder on the first page of the methods.

In Fig. 3, panels A-C are less important than panels D-F and should be reduced in relative size.

Suppl. Tab. 4 is not referenced anywhere in the text. I cannot find Suppl. Tab. 2 in the uploaded files. This is probably a numbering issue.

Legend of Suppl Fig. 8 refers to a Fig. 4, that does not exist.

## REVIEWER COMMENTS

Reviewer #1 (Remarks to the Author):

The authors have largely addressed the points raised during the initial review of their study. Having now reviewed this again with the inclusion of the methods there are a few queries that remain.

It is very difficult to follow the study design regarding the timeline of events. In the results section, there is a primary and secondary endpoint. In the methods section there is a primary combined end point. In figure 1a, there is a primary end point, time to clinical flare, event leading to primary end point and phase of event. It would be helpful if the nomenclature was the same for all 3 sections, with a definition of what these are, making it clear how the NK8+ population relates to them.

We thank the Reviewer for highlighting this point. We agree the terminology could be clearer and have altered this (Figure 1, manuscript lines 76-77) to be both internally consistent and consistent with the STAyCIS trial also, which defined the primary endpoint as either one clinical relapse or at least 3 new T2 lesions within 12 months. The definitions of features included in Fig1A have also been further clarified in the figure legend alongside description in the manuscript (lines 76-77).

Minor points:

1. The opening sentence to the results reads rather awkwardly and begins with what is not required before stating what was done. It makes the start of the results difficult to follow from the outset.

Thank you – the opening statement has been modified to make the point clearer and to improve the flow.

lines 66-68: “Unsupervised analyses of high throughput ‘omic’ data facilitate the discovery of previously unsuspected associations as they are, by definition, not founded on existing knowledge.”

2. In the methods section, it reads, ‘Cells were sorted into RNAlysis medium (XX)’.

Thank you – this omission has been corrected.

Methods, line 43: ‘Cells were sorted into RNAlysis medium (Tempus Blood RNA tubes, ThermoFisher)’

3. Supplementary figure 3B – the text is unreadable.

My apologies – the text format has now been altered to make this clear (Supplementary Figure 3B).

This study supports the notion that better patient stratification at disease onset will enable more aggressive treatment options to be given to patients who are considered at higher risk of relapse and thus reduce disease severity in the longer term. These results contribute to how we may hope to achieve this, relying on a relatively straightforward additional analysis to routine blood screening tests that can be measured at disease onset.

Reviewer #2 (Remarks to the Author):

After revision of the manuscript, the authors have properly answered the questions raised. The methodology is sound and clearly stated in the paper. Results are interesting, although sometimes not easy to follow, but with a potential translational approach in the MS field. My only concern is regarding a minor point about potential associations of NK8+ populations with modifications of the global NK cell compartment vs. specific NK8+ cells in relation to clinical activity, since data provided by the authors in the Responses to Reviewers do not seem to correspond to the mentioned figure (Supplementary Figure 4 C and D, the latter not included within the manuscript). I have nothing more to add.

We thank the Reviewer for their careful review of our work and apologise for the mislabelling in the text of the ‘Response to Reviewers’. This should have referred the Reviewer to Supplementary Figure 3D-G and was appropriately referenced in the manuscript text (now line 100).

Reviewer #3 (Remarks to the Author):

In their revised manuscript ‘A subset of regulatory CD8+ Natural Killer cells predict favourable clinical outcome in relapsing multiple sclerosis’, the authors demonstrate that a transcriptional pattern expressed by CD8 positive natural killer (NK) cells among peripheral blood mononuclear cells is associated with a favourable clinical outcome in multiple sclerosis (MS) after a first demyelinating event.

In this revised version of the manuscript, the previously omitted supplementary methods section is now included and now adequately evaluating the manuscript is possible.

The authors first performed a microarray-based transcriptional analysis of CD8+ cells enriched from frozen peripheral blood mononuclear cells derived from a clinical trial of patients with a first demyelinating event. In this dataset, they identified that a transcriptional module resembling natural killer cells that is specifically expressed in patients with a favourable clinical course of MS. They find that features of this module confer NK cells with enhanced suppressive capacity over autologous CD4 T cells through the invariant HLA-G molecule and confirm the predictive potential in a confirmatory patient cohort. Overall, the most interesting and relevant concept introduced by the study is the identification of a predictive biomarker for the subsequent clinical course of MS. Such a predictive parameter would be of major relevance to the field, since the course of MS cannot be well predicted at present.

In conclusion, the study has improved substantially from its previous version, identifies an interesting core finding, and would have relevance to the field. However, several aspects need improvement that could not be anticipated previously due to the lack of sufficient methodical information.

#### Major Points

The main finding is the potential predictive potential of the NK8 module. How does that perform when compared against known clinical and MRI predictors like for example lesion load, recovery from first relapse, multifocal and spinal manifestation vs. optic neuritis only? Can the authors statistically quantify the predictive potential of the NK8 module for this comparison?

We thank the Reviewer for their further consideration of the manuscript.

Known clinical and MRI predictors are listed along with extensive clinical metadata in Supplementary Table 1 and Supplementary Figure 2, illustrating that the NK signature identified does not correlate with them, indicating that it provides independent information.

However, as the Reviewer indicates, this doesn't mean that additional information provided by other baseline clinical covariates may not improve predictive power in combination with the NK signature. To set the NK signature in context of the predictive potential of additional clinical covariates we have now incorporated 14 baseline measures (reflecting the clinical, functional and radiological impact of the presenting demyelination episode alongside the NK eigenvector) into a penalised Cox proportional hazards model, identifying the contribution of each feature to the optimal model, as identified through cross-validation (elastic net model, Fig 1H, manuscript lines 90-94). This indicates that the NK signature makes the strongest contribution to predictive accuracy, although there is an additive contribution from radiological (baseline T1 lesion load) and clinical estimates of disease severity.

This analysis confirms that the signature identified is independent of baseline clinical traits and also that it may be used in concert with them to improve predictive accuracy.

If the current manuscript is correct, then I could start composing a qPCR panel to quantify the top NK8 surrogates in PBMCs collected from my MS patients now. And thereby predict the likely clinical course of these patients. But how would I compose that panel? I cannot find a Suppl. Table that lists these optimal surrogates. Why not show at least some of them in Fig. 3D? Can the optimal surrogates be further prioritized? It seems from Suppl. Fig. 8C that there is some gradient in the importance of these optimal surrogates. Which transcripts fare best? How few surrogates would suffice to predict?

We have now provided a Table (Supp Table 5) providing a list of the genes included in the optimal surrogate prediction. Supplementary Figure 8C shows the relative importance of each transcript in a random forests predictive model and Supplementary Table 5 also includes individual feature importance rankings and metrics.

I cannot find an abstract in the manuscript file.

Thank you – an abstract is now included.

I consider Fig. 1B as the key plot of the manuscript. How would the plot look if it were separated into two plots by atorvastatin treatment vs. placebo?

Thank you – Figure 1B illustrates the association between gene coexpression modules and the primary endpoint of the trial. To put this association in context we provided illustration of the same modules' association with other traits also, including by treatment group in the STAYCIS trial (Fig 1A, 'treatment group' and Supp Figure 2B-D). This demonstrates that no modules showed significant association with

treatment group in the trial (Fig 1A, first column). Treatment group is also now explicitly modelled alongside other baseline clinical traits in the penalised Cox model presented in Fig 1H. This shows that treatment group provides negligible support to the prediction of relapse.

Related to this: is it correct that all CD8+ samples were collected before treatment? Is it then also correct that the atorvastatin treatment cannot have affected the expression of the module? This should be mentioned explicitly.

This is correct and has now been mentioned explicitly in the manuscript (lines 54-55).

I do not understand why the confirmation cohort in Fig. 3E is depicted as a Kaplan-Meier curve, but the main cohort as volcano plot in Fig. 1B. I think both plots for both cohorts would be interesting.

We have chosen to use volcano and Kaplan-Meier plots respectively to illustrate the discovery and validation analyses as each analysis is quite different.

Our discovery approach involves unsupervised network coexpression modelling of CD8+ cells isolated from the discovery cohort. This generates multiple summary eigenvectors (one for each coexpression module) which are then correlated with extensive baseline and outcome clinical traits. A volcano plot is an appropriate means of illustrating the correlation of many such modular eigenvectors against the study endpoint (as shown in Fig 1B), something a Kaplan-Meier plot could not achieve (as it would require as many curves as there are modular signatures).

For the validation cohort, we are testing optimal surrogate markers of the NK signature in PBMC samples from MS patients. The optimal surrogate genes are used to identify binary groups of high and low risk which are then associated with time-to-event. As there are only two groups in question, a Kaplan-Meier plot is the preferred method (a volcano plot would only have one data point).

Some basic clinical details of the cANCA associated vasculitis patients used as negative controls should be provided; eg average age, disease duration, sex, CNS involvement yes/no, treatments, etc.

A table of clinical traits relating to the ANCA-associated vasculitis cohort is now included (Supplementary Table 6). No patients had CNS involvement and all were enrolled with samples taken prior to starting immunosuppressive therapy.

Minor points

In lines 14-15 the author's state that treatment options of RRMS relapses have expanded. The authors have changed the sentence, but I must insist on this: Relapses themselves have been treated with steroid and plasmapheresis / immune-adsorption for decades. Nothing has changed about this. Only the treatment of relapsing-remitting MS (i.e. preventing relapses, not treating relapses) has expanded dramatically. There is a difference.

We thank the Reviewer for highlighting this distinction – we have now modified the text to remove the suggestion that there has been an expansion of treatment options for RRMS (lines 29-30)

The paper by Gross et al. 2016 PNAS should be cited when discussing the function of NK cells in repressing CD4 T cells on pages 1 and 4.

This has now been referenced as suggested.

I cannot find a definition of the abbreviations WGCNA (line 58), MSE, and AAV.  
These have now been included where used.

Fig 1B: label of the x-axis should probably be: correlation with 'time to' PEP. Otherwise what is the unit of the PEP here?

Thank you – this has been altered as suggested.

Legend of Fig. 1F refers to a radar plot on the left, but the plot is missing from the figure.

Thank you – the legend has been corrected.

Fig. 1D: the heatmap probably depicts genes vs. patients, but it should be defined that columns refer to patients.

This is correct and has been made explicit in the figure legend (Fig1D).

There is still an 'XX' as a placeholder on the first page of the methods.

Thank you. This has been corrected.

In Fig. 3, panels A-C are less important than panels D-F and should be reduced in relative size.  
The sizes have been adjusted as suggested.

Suppl. Tab. 4 is not referenced anywhere in the text. I cannot find Suppl. Tab. 2 in the uploaded files.  
This is probably a numbering issue.  
There are now 7 supplementary tables which are referenced in the appropriate order in the manuscript.

Legend of Suppl Fig. 8 refers to a Fig. 4, that does not exist.  
Thank you – the legend has been updated to appropriately refer to Fig 3D.

## REVIEWERS' COMMENTS

Reviewer #1 (Remarks to the Author):

The various comments from the referees have now been addressed. However, I would strongly recommend the authors to review their manuscript to make sure that there are no further omissions such like a forgotten abstract etc.

Reviewer #3 (Remarks to the Author):

All my previous concerns have been thoroughly addressed. Especially the new panel in Figure 1H considerably supports the key findings of the manuscript. I recommend accepting the manuscript.
