# Supplementary material for: A CD8+ NK cell transcriptomic signature associated with clinical outcome in relapsing remitting multiple sclerosis
Source: PubMed Central journal article supplement (PMC7840761; doi:10.1038/s41467-020-20594-2), 2021-01-27
Supplement: 41467_2020_20594_MOESM4_ESM.pdf [file 41467_2020_20594_MOESM4_ESM.pdf]

## **Descriptions of Additional Supplementary Files**

### **Supplementary Data 1**

**Description:** Association of NK8 'black' module with baseline laboratory data, supporting clinical data and baseline clinical traits (relating to heatmaps shown in Supplementary figs 2B, C and D respectively).

### **Supplementary Data 2**

**Description:** NK enriched 'black' module feature description and annotation

### **Supplementary Data 3**

**Description:** Genes differentially expressed by NK8+ and NK8- subsets

### **Supplementary Data 4**

**Description:** Staining pattern and antibody clone ids for flow cytometric quantification of KIR receptors

### **Supplementary Data 5**

**Description:** Optimal surrogate genes reflecting the NK8+ subgroups in PBMC samples

### **Supplementary Data 6**

**Description:** Clinical characteristics of AAV cohort.

### **Supplementary Data 7**

**Description:** Clinical Characteristics of MS Validation cohort by prognostic subgroup
